# Supplementary material
Source: publisher figshare collection journal article supplement (https://asha.figshare.com/ndownloader/files/31857761)
Supplement: Supplementary file 1 [file 31857761]

Supplemental Table 1

*Summary of False Positive Judgments: Production Errors Which Were Judged as Being Correct*

| ID | Total False Positives:  Error not Identified | | Distortion | | Phoneme Boundary CrossedA | | Phoneme Boundary Crossed with DistortionB | | Added or Deleted Segments or Syllables | | Multiple Errors  Types | | Segment Type  C, V, CV | |
| --- | --- | --- | --- | --- | --- | --- | --- | --- | --- | --- | --- | --- | --- | --- |
|  | T1 | T2 | T1 | T2 | T1 | T2 | T1 | T2 | T1 | T2 | T1 | T2 | T1 | T2 |
| 1 | 0 | 1 | 0 | 0 | 0 | 1 | 0 | 0 | 0 | 0 | 0 | 0 | 0 | 1 V |
| 2 | 2 | 1 | 0 | 0 | 0 | 1 | 0 | 0 | 0 | 0 | 2 | 0 | 5 C | 1 C |
| 3 | 5 | 7 | 0 | 1 | 0 | 1 | 0 | 0 | 3 | 2 | 2 | 3 | 6 C, 1 V | 11 C, 1 V |
| 4 | 6 | 8 | 3 | 2 | 2 | 3 | 0 | 0 | 1 | 2 | 0 | 1 | 6 C | 9 C |
| 5 | 4 | 4 | 1 | 0 | 1 | 1 | 0 | 0 | 2 | 1 | 0 | 2 | 3 C, 1 CV | 2 C, 3 V, 1 CV |
| 6 | 0 | 2 | 0 | 1 | 0 | 1 | 0 | 0 | 0 | 0 | 0 | 0 | 0 | 2 C |
| 7 | 1 | 2 | 0 | 0 | 1 | 1 | 0 | 0 | 0 | 1 | 0 | 0 | 1 C | 2 C |
| 8 | 1 | 10 | 0 | 0 | 0 | 1 | 0 | 0 | 1 | 1 | 0 | 8 | 1 VC | 14 C, 3 V, 2 VC, 1 CV, 3 CVC, 1 CVCVC, 1 CCVCVC |
| 9 | 2 | 2 | 0 | 0 | 2 | 2 | 0 | 0 | 0 | 0 | 0 | 0 | 2 C | 2 C |
| 10 | 2 | 0 | 0 | 0 | 1 | 0 | 0 | 0 | 0 | 0 | 1 | 0 | 1 V, 2 C | 0 |
| 11 | 3 | 6 | 0 | 0 | 0 | 1 | 2 | 0 | 1 | 3 | 0 | 2 | 1 V, 2 C | 5 C, 3 V, 1 VC |
| 12 | 2 | 1 | 0 | 1 | 1 | 0 | 0 | 0 | 1 | 0 | 0 | 0 | 1 V, 1 C | 1 C |
| 13 | 7 | 8 | 0 | 0 | 3 | 4 | 0 | 0 | 1 | 0 | 3 | 4 | 1 V, 10 C, 1 CV | 14 C, 3 V |
| 14 | 2 | 1 | 0 | 0 | 2 | 0 | 0 | 0 | 0 | 0 | 0 | 1 | 2 V | 1 V, 1 C |
| 15 | 2 | 2 | 2 | 1 | 0 | 0 | 0 | 0 | 0 | 0 | 0 | 1 | 2 C | 2 C |
| 16 | 1 | 2 | 0 | 0 | 0 | 1 | 0 | 0 | 0 | 1 | 1 | 0 | 2 C | 2 C |
| 17 | 2 | 3 | 1 | 1 | 1 | 0 | 0 | 0 | 0 | 1 | 0 | 1 | 2 C | 3 C, 1 V |
| 18 | 1 | 1 | 0 | 0 | 0 | 0 | 0 | 1 | 0 | 0 | 1 | 0 | 1 C, 1 V | 1 C |
| 19 | 0 | 1 | 0 | 0 | 0 | 1 | 0 | 0 | 0 | 0 | 0 | 0 | 0 | 1 V |
| 20 | 8 | 6 | 1 | 0 | 3 | 5 | 0 | 0 | 1 | 0 | 3 | 1 | 10 C | 3 C, 4 V |
| 21 | 2 | 1 | 0 | 0 | 1 | 0 | 0 | 0 | 1 | 1 | 0 | 0 | 2 C | 1 C |
| 22 | 2 | 7* | 0 | 0 | 0 | 2 | 0 | 1 | 1 | 1 | 1 | 2 | 3 C | 7 C, 1 CV |
| 23 | 5 | 9 | 0 | 0 | 5 | 2 | 0 | 0 | 0 | 1 | 0 | 6 | 4 C, 1 CV | 14 C, 1 CC, 2 CV |
| 24 | 6 | 6 | 2 | 2 | 2 | 3 | 0 | 1 | 1 | 0 | 1 | 0 | 6 C, 2 V | 6 C |

A = error perceived as substitution but may have been extreme distortion

B = distorted perceived substitution

ID = participant identifier; C = consonant; V = vowel; CV = consonant-vowel

*one false positive was not audiorecorded and error type could not be determined
